# Supplementary material for: A facile synthesis of CuSe nanosheets for high-performance sodium-ion hybrid capacitors
Source: Royal Society of Chemistry journal article supplement (doi:10.1039/d2ra03206f), 2022-01-01
Supplement: d2ra03206f1.pdf [file d2ra03206f1.pdf]

## Supporting Information for

### Facile Synthesis of CuSe Nanosheets for High-Performance Sodium-Ion hybrid capacitor

Chen Chen,<sup>a,\*,1</sup> Qilin Hu,<sup>a,1</sup> Fan Yang,<sup>a</sup> Hongyu Xue,<sup>a</sup> Yuning Zhang,<sup>a</sup> Hailong Yan,<sup>a</sup> Yang Lu,<sup>a</sup> and Yongsong Luo<sup>a,b,\*</sup>

<sup>a</sup> Key Laboratory of Microelectronics and Energy of Henan Province, Henan Joint International Research Laboratory of New Energy Storage Technology, School of Physics and Electronic Engineering, Xinyang Normal University, Xinyang 464000, P. R. China

<sup>b</sup> School of Physics and Electronic Engineering, Nanyang Normal University, Nanyang 473061, P. R. China

\* The corresponding authors

Email address: chenpaper@outlook.com (C. Chen), ysluo@xynu.edu.cn (Y. Luo).

<sup>1</sup> These authors contributed equally to this work.

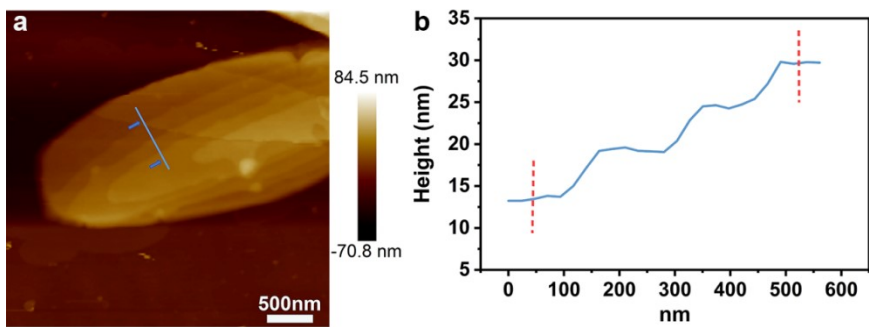

Fig. S1 (a) AFM image and (b) corresponding line-scan curves of the CuSe nanosheets.

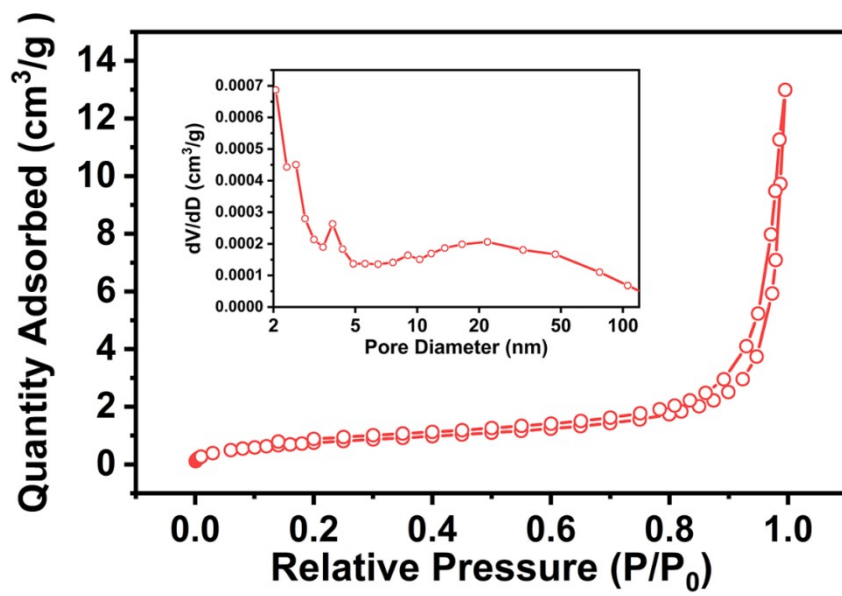

Fig. S2 Nitrogen adsorption/desorption isotherms and Pore size distributions of the CuSe nanosheets.

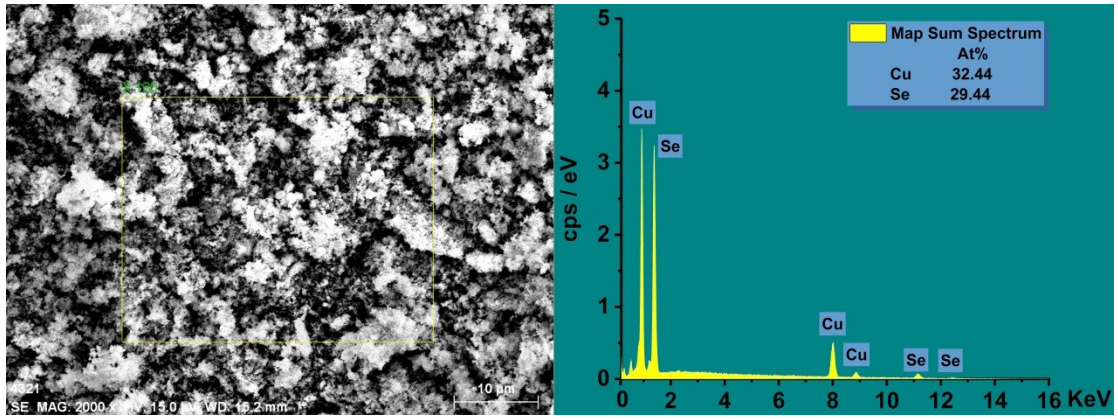

Fig. S3 The energy dispersive X-ray spectra of CuSe nanosheets.

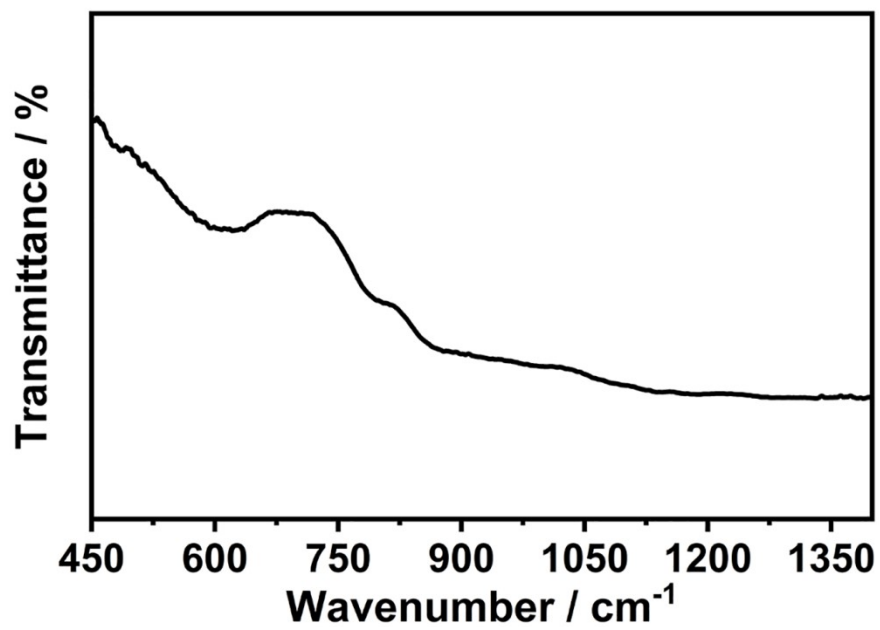

Fig. S4 FTIR spectra of the CuSe nanosheets.

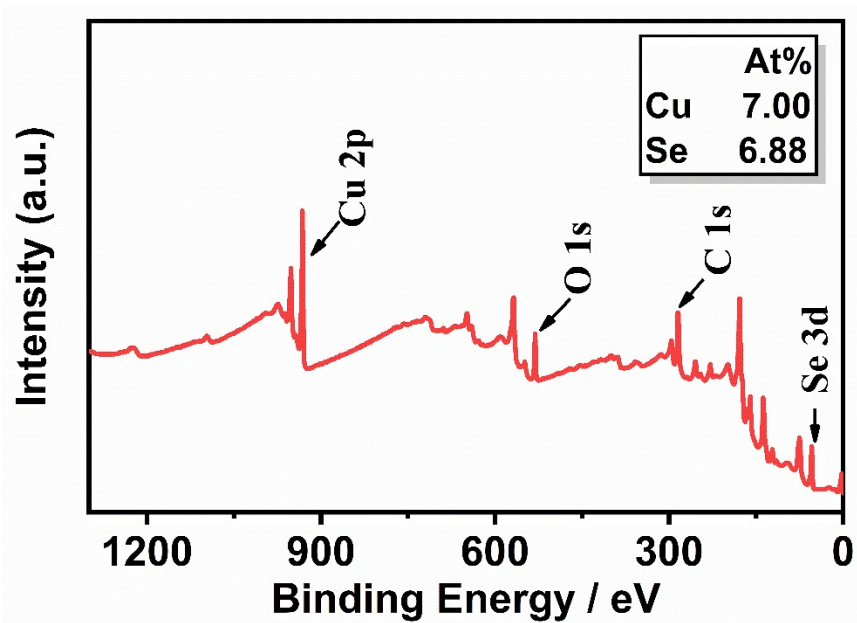

Fig. S5 The XPS survey spectrum of CuSe nanosheets.

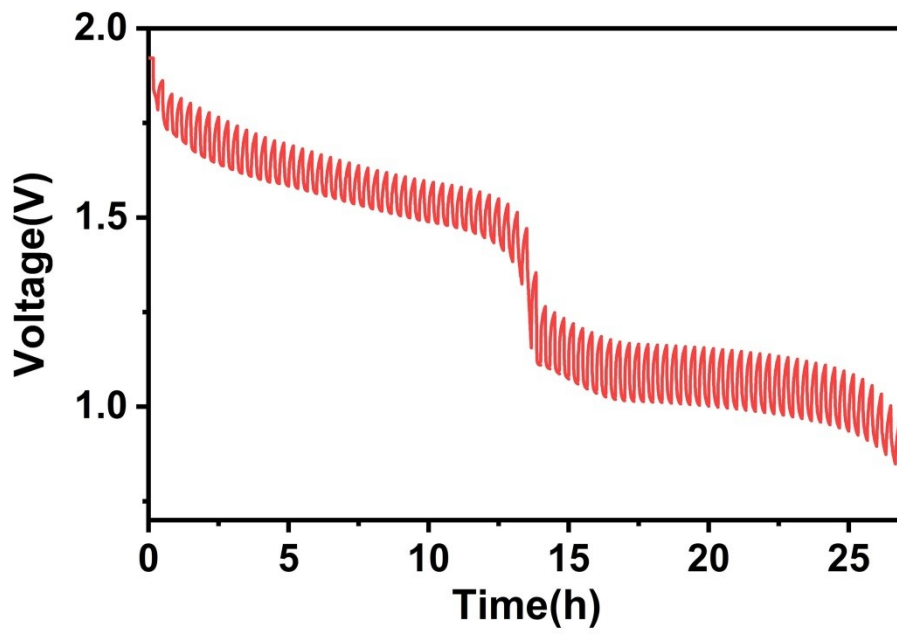

Fig. S6 GITT curve of the electrode material.
